# Supplementary material
Source: bioRxiv or medRxiv preprint supplement (https://www.biorxiv.org/highwire/filestream/62242/field_highwire_adjunct_files/4/130948-3.pdf)
Supplement: Supplementary file [file 130948-3.pdf]

# Supplementary Figure 3

**a**

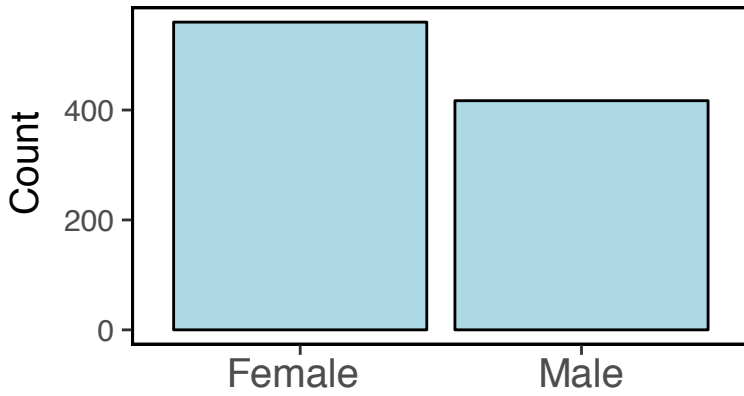

**b**

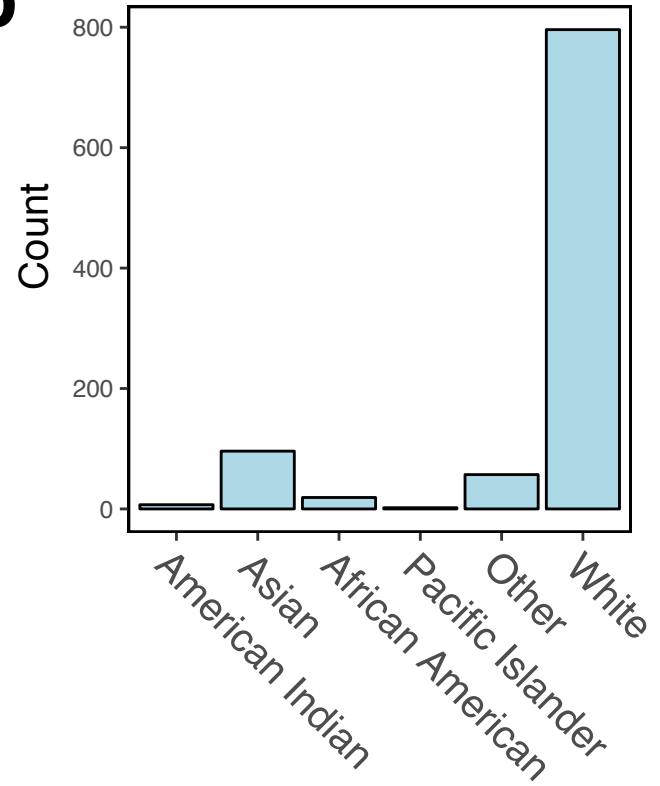

**c**

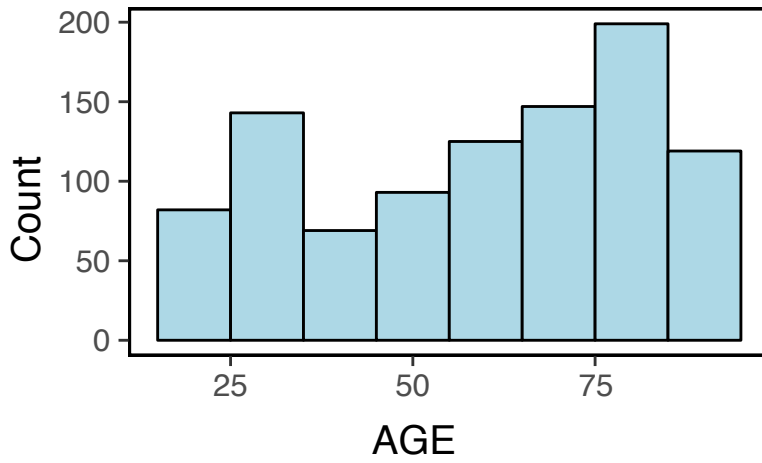

Supplementary Figure 3: Demographics of subjects included in the meta-analysis of 10 human immunology studies. Bar graphs show the distribution of gender (a), race (b) and age (c).
